# Supplementary material
Source: PubMed Central journal article supplement (PMC5959762)
Supplement: NIHMS948918-supplement-1.pdf [file NIHMS948918-supplement-1.pdf]

## SUPPLEMENTARY FIGURES AND TABLE

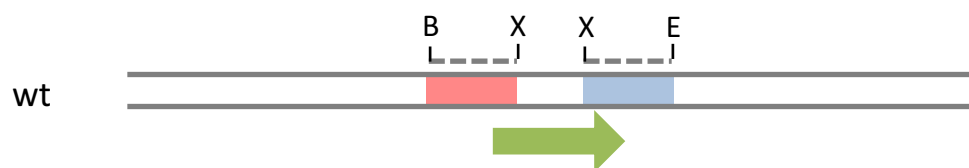

KO mutant

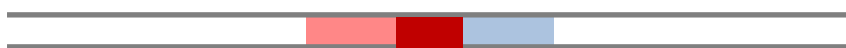

**Figure S1. Scheme of gene knockouts, Related to STAR Methods.** The target *pum* gene is indicated by a green arrow: two fragments of ~1.5-kbp each were amplified from genomic DNA (wt) using primers containing *Bam*HI (B) and *Xba*I (X) and *Xba*I and *Eco*RI (E) tails (Table S1). In the knockout (KO) mutant the target *pum* gene is replaced by the apramycin resistance gene (in red).

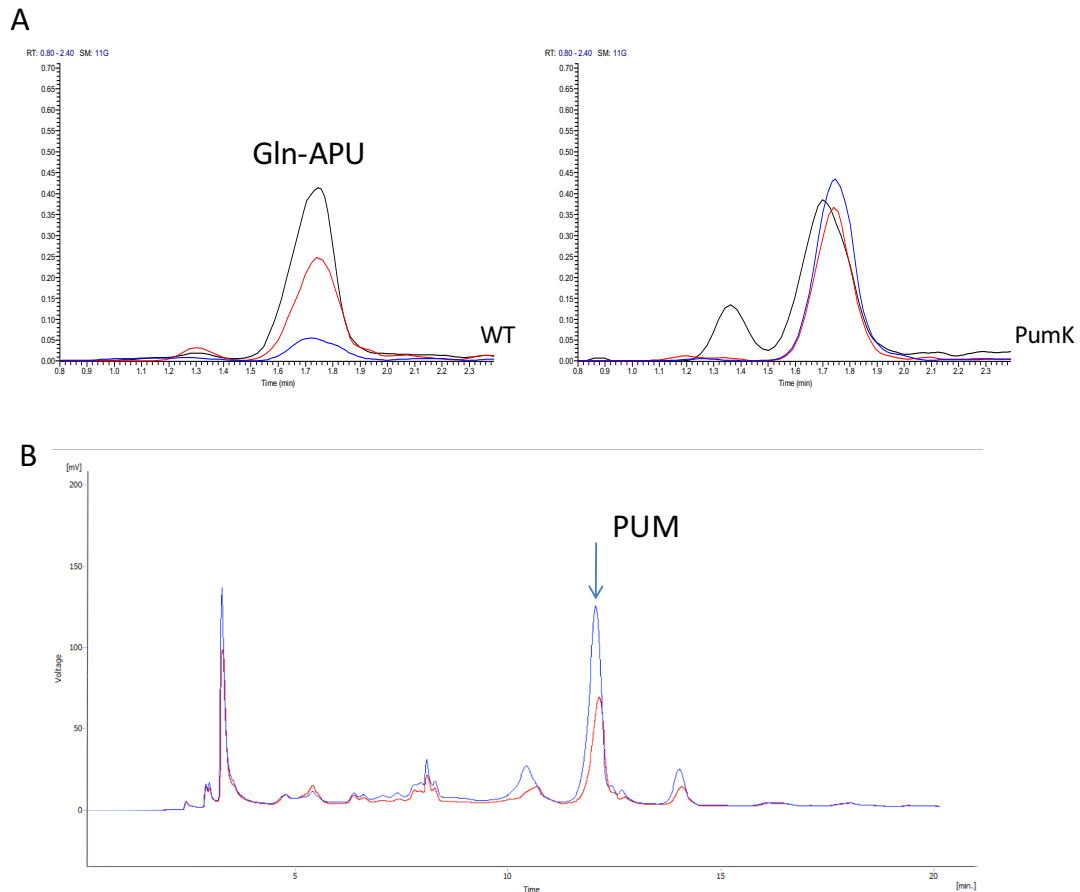

**Figure S2. Addition of Gln-APU (Panel A) Related to Figure 3, and of guanidinoacetic acid (Panel B) Related to Figure 4.** (A) Extracted ion chromatograms of Gln-APU ( $m/z$  372  $[M+H]^+$ ) at 24h (black line), 48h (red line) and 72h (blue line) from duplicate cultures of the parental strain (WT) and of the *pumK* mutant (PumK) grown in medium supplemented with Gln-APU. (B) HPLC profile of *Streptomyces* sp. ID38673 culture extract without (red line) and with (blue line) 0.5 mg/mL guanidinoacetic acid. The PUM peak is indicated. Samples were analyzed as described in STAR Method with detector set at 262nm.

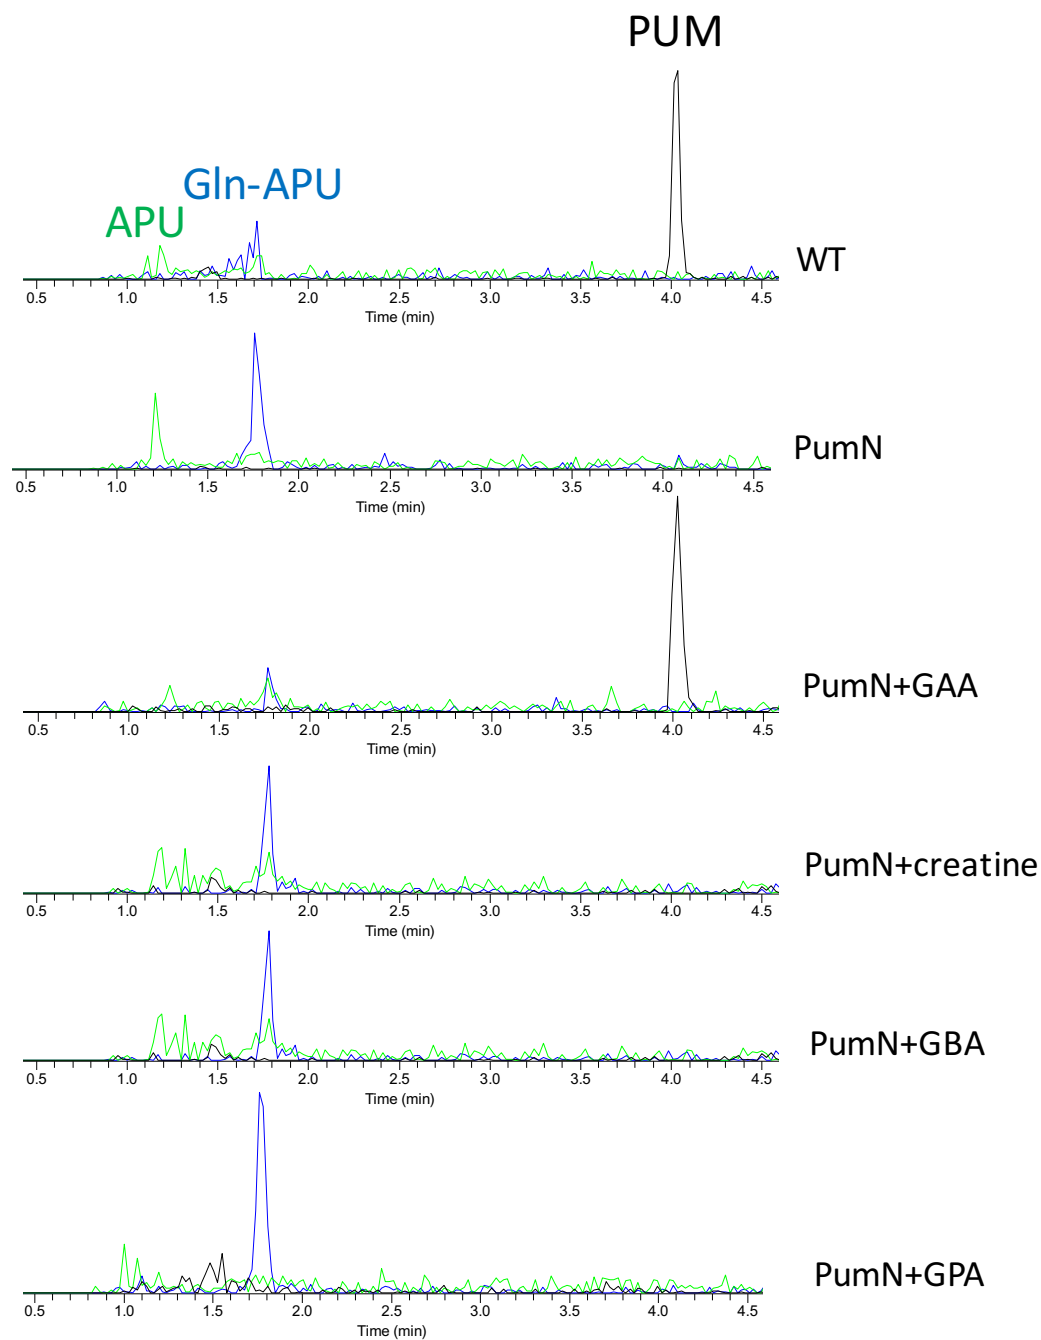

**Figure S3. Supplementation of the *pumN* mutant, Related to Figure 4.** Analyses were performed on cultures of the parental strain (WT), and of the *pumN* mutant without (PumN), and with (PumN + GAA, PumN+ creatine, PumN + GBA and PumN+ GPA) supplementation with 0.5 mg/mL guanidinoacetic acid (GAA), creatine, guanidinobutyric acid (GBA) and guanidinopropionic acid (GPA), respectively. The analyses show extracted ion chromatograms of pseudouridimycin (PUM,  $m/z$  487  $[M+H]^+$ , black line), aminopseudouridine (APU,  $m/z$  244  $[M+H]^+$ , green line) and Gln-APU ( $m/z$  372  $[M+H]^+$ , blue line).

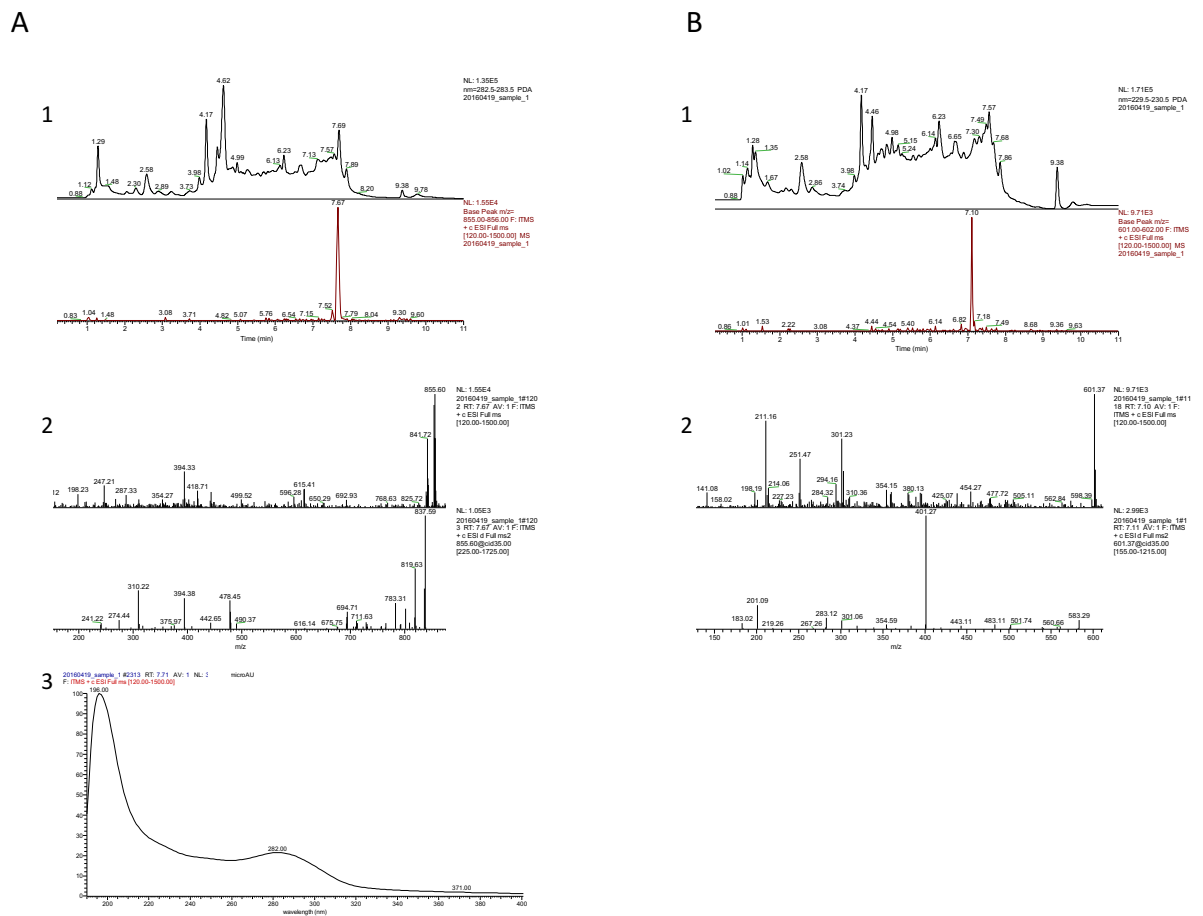

**Figure S4. Identification of lydicamycin and desferrioxamine, Related to STAR Methods.**

(A) **Lydicamycin.** 1. HPLC trace at 283 nm of a cell-free broth of the WT strain (top) and extracted ion chromatogram of  $m/z$  855  $[M+H]^+$  (bottom); 2. MS at 7.67 min and MS/MS of the ion at  $m/z$  855  $[M+H]^+$ ; 3. total UV-vis spectrum of the 7.67-min peak. (B) **Desferrioxamine.** 1. HPLC trace at 230 nm of a cell-free broth of the WT strain and extracted ion chromatogram of  $m/z$  601  $[M+H]^+$ ; 2. MS at 7.10 min and MS/MS spectrum of the ion at  $m/z$  601  $[M+H]^+$ .

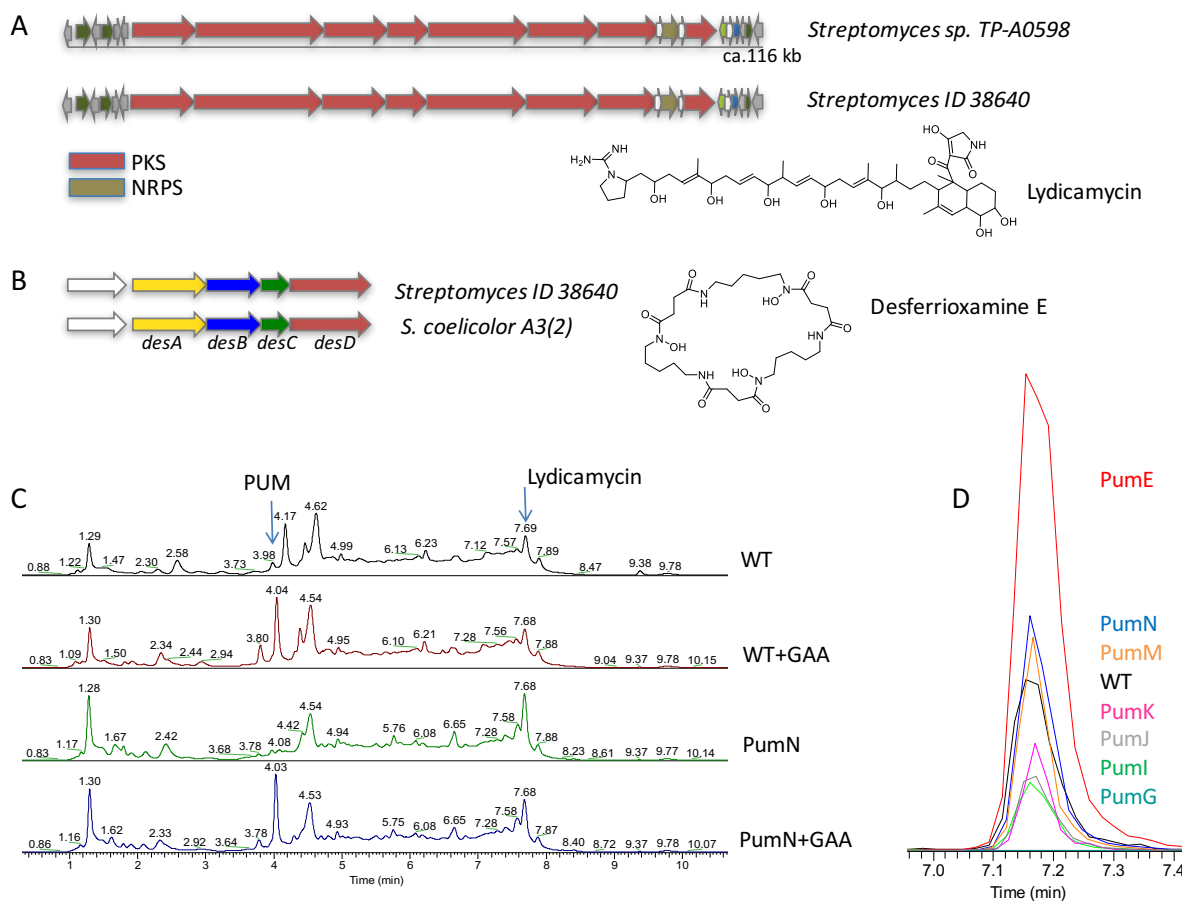

Figure S5. The lydicamycin and desferrioxamine B biosynthetic gene clusters (Panel A and B), Related to STAR Methods. Effect of pum mutations on lydicamycin and desferrioxamine (Panel C and D), Related to Figure 1-4.

(A) Organization of the lydicamycin biosynthetic cluster of *Streptomyces sp. TP-A0598* (Komaki et al., 2015) and of *Streptomyces sp. ID38640*. The structure of lydicamycin is shown below. (B) Organization of the desferrioxamine B biosynthetic cluster of *S. coelicolor A3(2)* (Barona-Gómez et al., 2004) and of *Streptomyces sp. ID38640*. The structure of desferrioxamine B is shown below. (C) LC analysis of the parental strain (WT), and of the pumN mutant without (PumN), and with (PumN + GAA) supplementation with 0.5 mg/mL guanidinoacetic acid. The figure shows the extracted ion chromatograms of pseudouridimycin (PUM, m/z 487 [M+H]<sup>+</sup>, black line). (D) Extracted ion chromatograms at 7.1 min (m/z 601 [M+H]<sup>+</sup>) showing desferrioxamine levels in the parental strain (WT) and in the pum mutants.

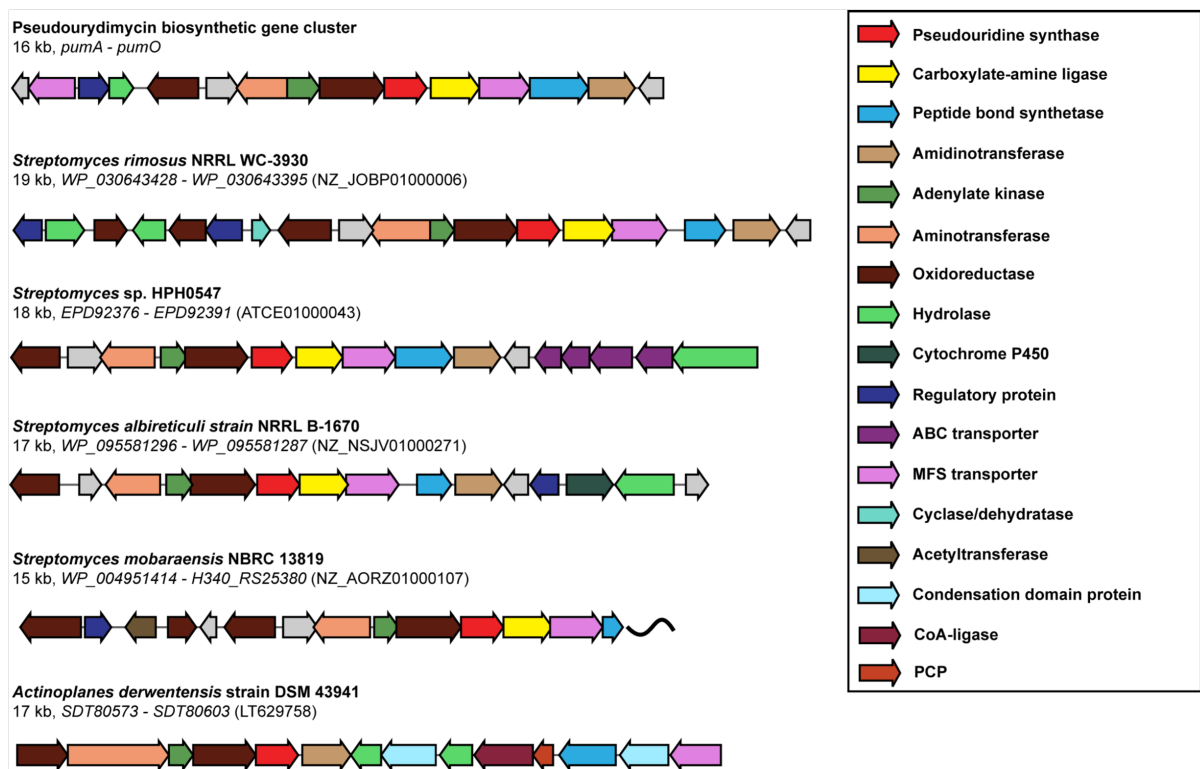

Figure S6. Organization of family 1 BGCs, Related to Figure 5. Selected BGCs from Figure 5 are reported, i.e. one subspecies for *S. rimosus* and *S. albireticuli*. The predicted functions of the CDSs are color-coded as in the side panel.

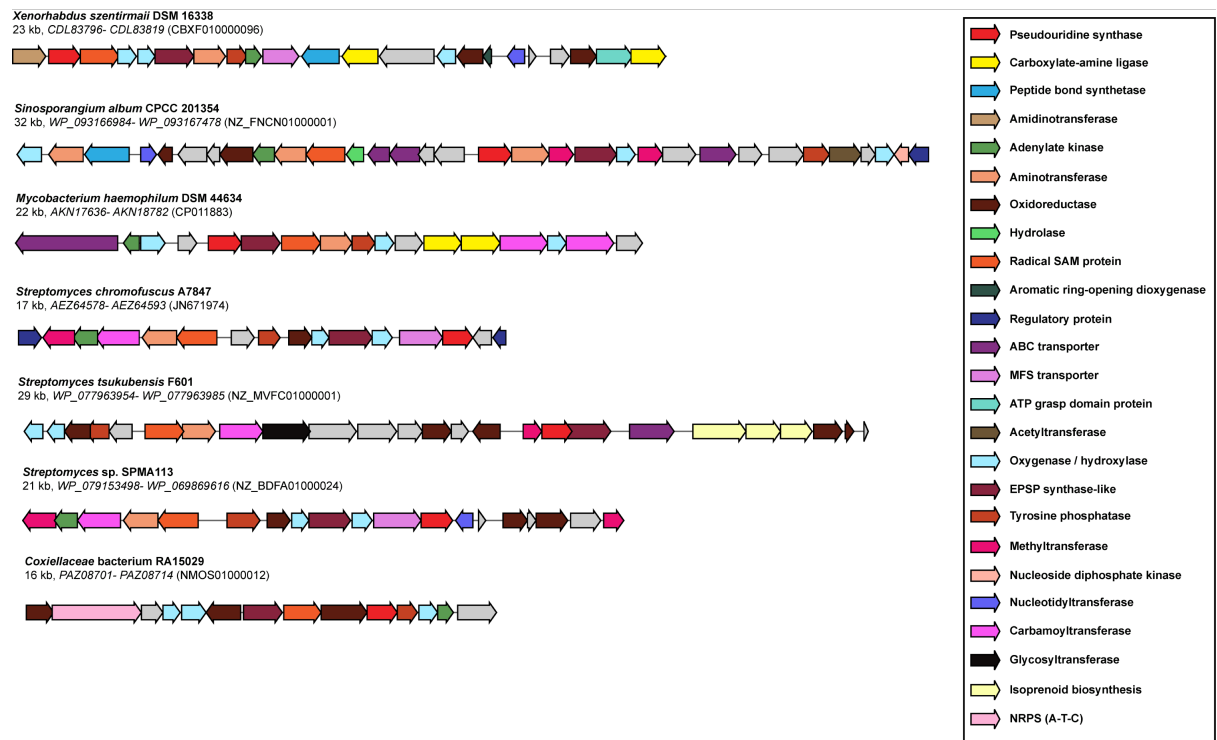

**Figure S7. Organization of family 2 BGCs, Related to Figure 5.** Selected BGCs from Figure 5 are reported. The predicted functions of the CDSs are color-coded as in the side panel.

**Supplementary Table S1.** List of primers used for knock out experiments, Related to STAR Methods

| gene        | fragment <sup>a</sup> | Sequence (5'-3')                 |
|-------------|-----------------------|----------------------------------|
| <i>pumE</i> | A                     | TTTGAATTCGACCTCTTCGGCGTCATC      |
|             |                       | TTTTCTAGAGACACCACGCTGGGCCTG      |
|             | B                     | TTTTCTAGAAATCGACATGATGCCTCCACGTT |
|             |                       | TTTAGATCTTGCGGACCTGTGACCTG       |
| <i>pumI</i> | A                     | TTTGAATTCATCGCTGACGCCATCGC       |
|             |                       | TTTTCTAGAGAAGCCCTGACGCATCGGTA    |
|             | B                     | TTTTCTAGAGGCAAGTGACCGGCACCCT     |
|             |                       | TTTGGATCCGAGGGCAACAGGAAGGAGAC    |
| <i>pumJ</i> | A                     | TTTGAATTCCGTGGCCGACCACAACG       |
|             |                       | TTTTCTAGACAGGGTGCCGGTCACTTGCCTC  |
|             | B                     | TTTTCTAGACGGCAGTTGGTCTCCGCC      |
|             |                       | TTTGGATCCGCCGCTGCGAGCAT          |
| <i>pumK</i> | A                     | TTTGAATTCAAGCACCGCCAGGAGGAC      |
|             |                       | TTTTCTAGAGCCGGGAGCAGGGGAAG       |
|             | B                     | TTTTCTAGACGATGGGCGGCACCGTGA      |
|             |                       | TTTGGATCCGAGGGAGACCGCGACCA       |
| <i>pumM</i> | A                     | TTTGAATTCCTGGGCAGCGGCGTCTGG      |
|             |                       | TTTTCTAGACCGCCTGGAGGTGCTGGTCAT   |



|                             |   |                                |
|-----------------------------|---|--------------------------------|
|                             | B | TTTTCTAGACGCACGGAAACAGCGCAC    |
|                             |   | TTTAGATCTTCTCCTGGGCCTCGCAGAC   |
| <i>pumN</i>                 | A | TTTGAATTCTCGAGGCGTGGCTG        |
|                             |   | TTTTCTAGAATTGACCAGGCTCACC      |
|                             | B | TTTTCTAGATTGCCGCTGGTTACCGG     |
|                             |   | TTTGGATCCTCCTCGCGGTGTGCGGC     |
| <i>aac(3)IV<sup>b</sup></i> | A | TTTTCTAGAGTTCATGTGCAGCTCCATCAG |
|                             | B | TTTTCTAGACAGCAATCAGCGCGACCTTG  |
| <i>tsr<sup>b</sup></i>      | A | CGGGGATCGACCGCGCGGGT           |
|                             | B | AGTGCCCGCCCGGACCACGA           |

<sup>a</sup> see STAR methods for details and Figure S1; <sup>b</sup> primers used for PCR analysis of the ex-conjugants. *aac(3)IV*, apramycin resistance gene, *tsr*, thiostrepton resistance gene
